# Supplementary material for: Participants’ Perspective of Engaging in a Gym-Based Health Service Delivered Secondary Stroke Prevention Program after TIA or Mild Stroke
Source: MDPI journal article supplement (doi:10.3390/ijerph182111448), 2021-10-30
Supplement: s1 [file s1]

Archive with 2 entries (2 files):
- Supplementary material 1. Discussion guide for semi-structured interviews.pdf
- SUPPLEMENTARY MATERIAL TABLE 2 example of coding tree.pdf
