# Supplementary material for: Participants’ Perspective of Engaging in a Gym-Based Health Service Delivered Secondary Stroke Prevention Program after TIA or Mild Stroke
Source: MDPI journal article supplement (doi:10.3390/ijerph182111448), 2021-10-30
Supplement: s1 [file s1 › SUPPLEMENTARY MATERIAL TABLE 2 example of coding tree.pdf]

## SUPPLEMENTARY MATERIAL 2

### Participants' perspective of engaging in a gym-based health service delivered secondary stroke prevention program after TIA or mild stroke.

**TABLE S1. EXAMPLE OF CODING TREE**

| Initial narrative data to be coded                                                                                                                                                                                                                     | Initial open coding First level code (node)                                                            | Focused coding                         | Dimension              | Subcategory           | Category                    | Concept              |
|--------------------------------------------------------------------------------------------------------------------------------------------------------------------------------------------------------------------------------------------------------|--------------------------------------------------------------------------------------------------------|----------------------------------------|------------------------|-----------------------|-----------------------------|----------------------|
| <i>They spent plenty of time with us to make sure we could do the exercise and that we were ok. They were constantly coming over check to see how your heart rate and breathing was going. You were always monitored so I didn't have any problems</i> | Input from health professional<br><br>Feelings of safety<br><br>What I can do<br><br>Aspect of program | One on one support<br><br>Safety       | Monitoring me          | In person             | Health professional support | What it offered me   |
| <i>A big part was for me was being around people that have been through that experience. It was great to have a shared experience. Knowing I'm not alone -it's probably therapy in itself</i>                                                          | Part of the group<br><br>Sharing experiences<br><br>Aspects of program<br><br>Alone                    | Being with others<br><br>Companionship | Sharing experiences    | Mutual support        | Being in a group            | What it offered me   |
| <i>I've got dreams and goals so I know what I want to do and where I want to go so now I want to get there and so being unhealthy is not going to help me do it</i>                                                                                    | Determination<br><br>Value<br><br>Motivation to carry on                                               | Doing it for the family                | Connecting with my why | Thinking differently  | Making changes              | What I got out of it |
| <i>It let me see that I could do things that I didn't think I could do. I didn't think I'd be ever able to do the things in the gym, which was probably a ridiculous notion on my part but</i>                                                         | Reasoning<br><br>Motivation to continue<br><br>Understanding                                           | Taking charge                          | Gaining confidence     | Psychological factors | Feeling better              | What I got out of it |

|                                |  |  |  |  |  |  |
|--------------------------------|--|--|--|--|--|--|
| <i>that was how I<br/>felt</i> |  |  |  |  |  |  |
|--------------------------------|--|--|--|--|--|--|
